# Supplementary material for: Heading toward Miniature Sensors: Electrical Conductance of Linearly Assembled Gold Nanorods
Source: MDPI journal article supplement (doi:10.3390/nano13091466), 2023-04-25
Supplement: s1 [file s1]

# Supporting Information to

## Heading Toward Miniature Sensors: Electrical Conductance of Linearly Assembled Gold Nanorods

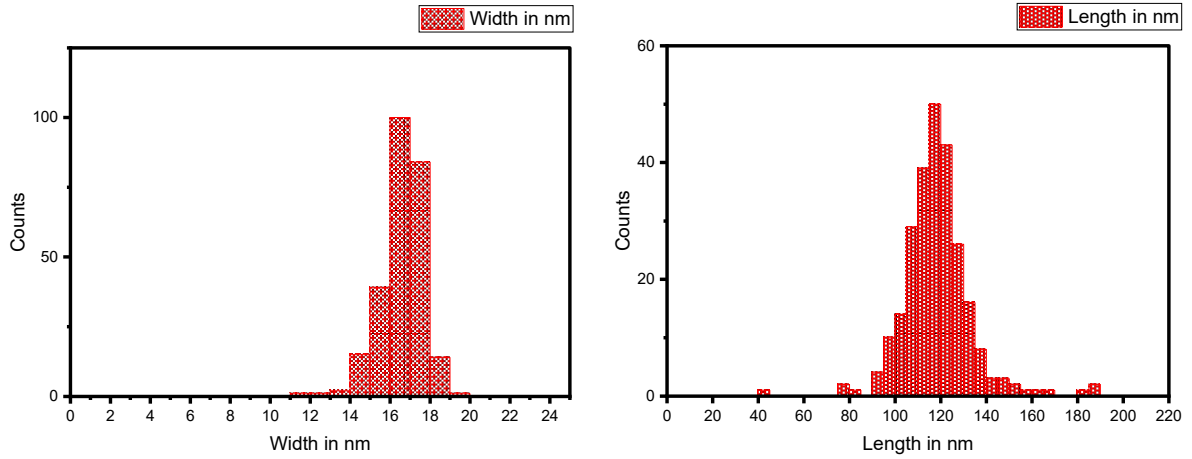

**Figure S1:** Histograms of the AuNRs' dimensions, their width (left) and length (right), derived from TEM measurements.

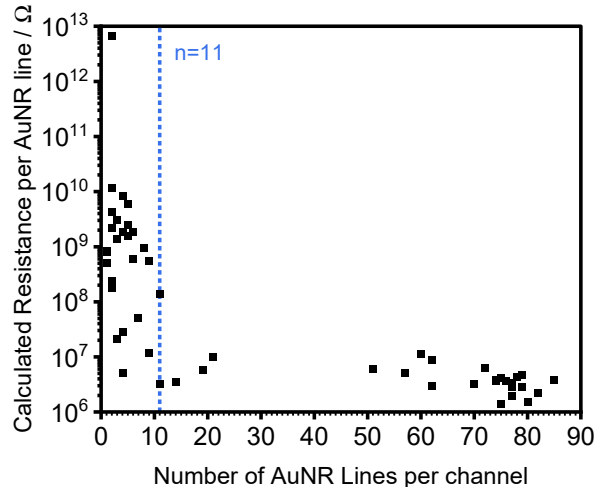

**Figure S2:** Conductivity measurements: Calculated mean resistance for single AuNR lines,  $R_{\text{single}}$ .

A mean resistance of a single AuNR line in a certain channel,  $R_{\text{single}} = n \cdot R_{\text{total}}$  can be calculated, corresponding to AuNR lines acting as resistors with uniform resistance connected in parallel. If this assumption is correct, the calculated resistances per AuNR line,  $R_{\text{single}}$  should be constant over all numbers  $n$  of AuNRs. However, as can be seen from the figure, the more AuNR lines connect a pair of electrodes, the lower is  $R_{\text{single}}$ . Only for more than 11 AuNR lines per channel, the  $R_{\text{single}}$  values are more or less constant and therefore, meet the

assumption of our model of uniform AuNR lines acting as ohmic resistors connected in parallel.

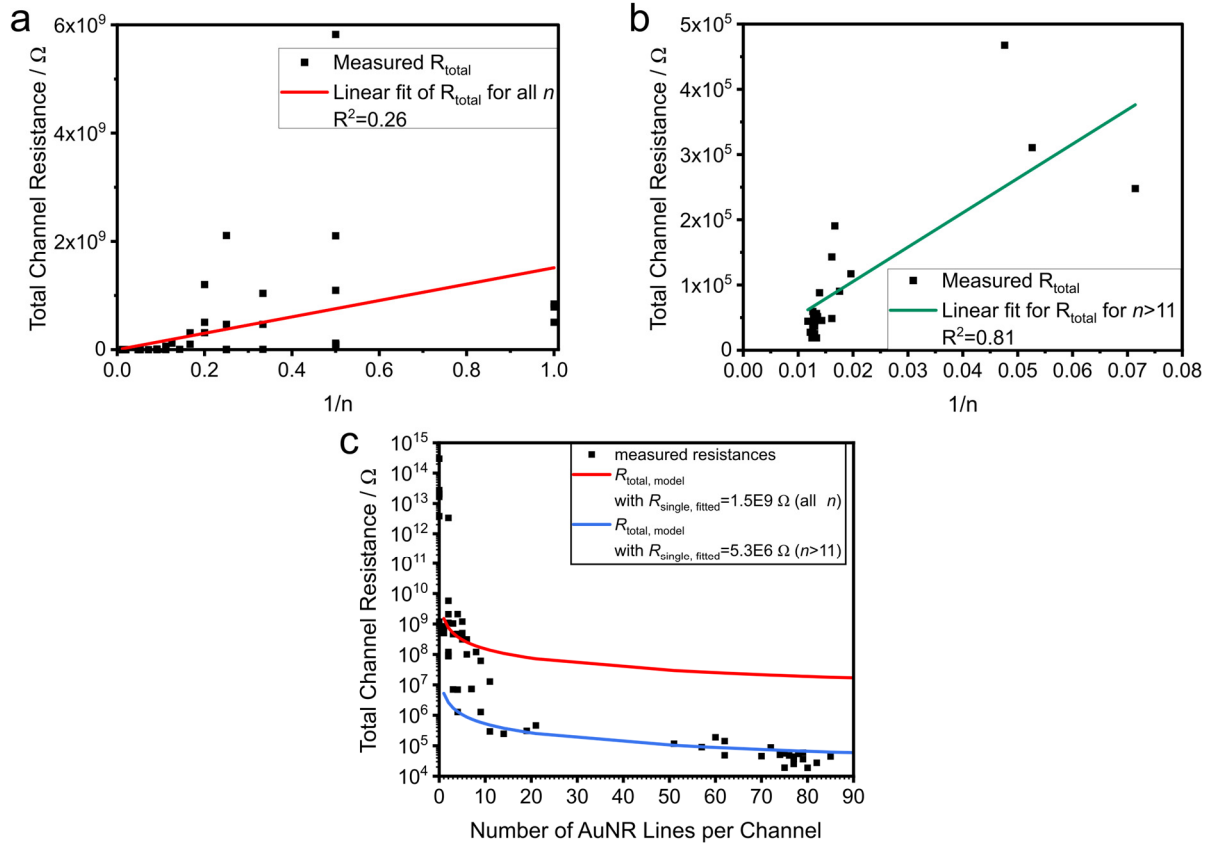

**Figure S3:** Linear fit of the measured  $R_{\text{total}}$ , including (a, red) all total channel resistance values except one outlier  $R_{\text{total}}=3.35 \text{ T}\Omega$ , for  $n=2$  and (b, green) only the total channel resistance values for  $n>11$ , respectively. (c) All measured total channel resistances and the model for  $R_{\text{total}}$  by using the  $R_{\text{single,fitted}}$  derived from the linear regression.

If all measured  $R_{\text{total}}$  for  $1 \leq n \leq 85$  are used to calculate  $R_{\text{single}}$  by regression with the equation

$$R_{\text{total,mean}} = R_{\text{single,fitted}} \cdot \frac{1}{n}$$

the linear regression unsurprisingly is not satisfactory and has a very low coefficient of determination ( $R^2$ ) of 0.26, even if we omit the clear outlier  $R_{\text{total}}=3.35 \text{ T}\Omega$  for  $n=2$ . Hence, the corresponding model for  $R_{\text{total}}$  does not fit the experimental data well (c, red graph). The overall trend of the measured  $R_{\text{total}}$  cannot be reproduced, as for  $n \leq 11$  the measured resistances do not provide an adequate base to calculate a model  $R_{\text{total,model}}$ . On the contrary, the model  $R_{\text{total,model}}(n \geq 11)$  fits the data well for the ohmic-resistors-regime (c, blue graph).

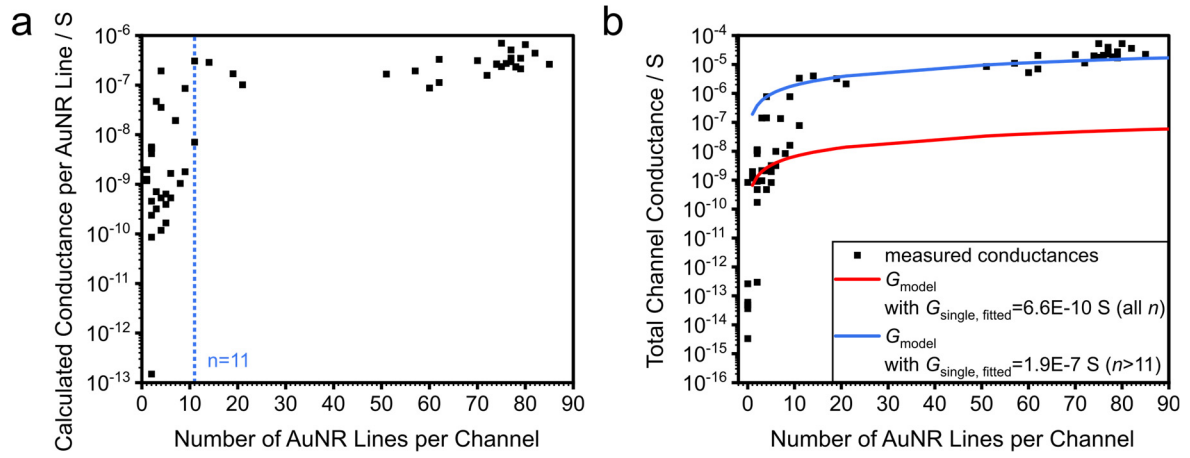

**Figure S4:** Conductivity measurements: (a) calculated conductances per AuNR line and (b) total channel conductances  $G$ , measured and modeled values.

The equation used for a) is  $G_{\text{total}} = n \cdot G_{\text{single, fitted}}$ .

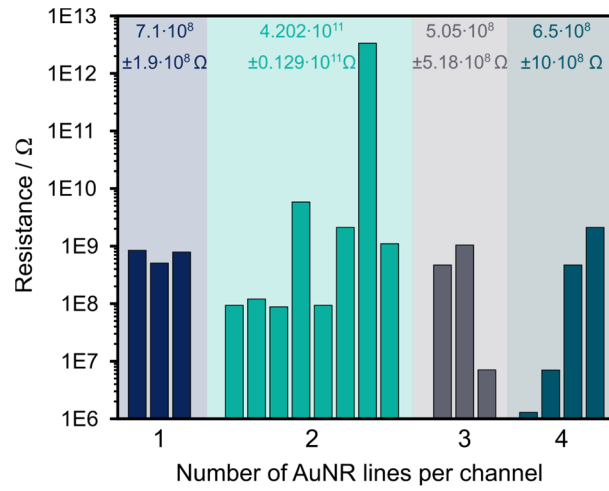

**Figure S5:** The measured channel resistances for  $n=1$ ,  $n=2$ ,  $n=3$  and  $n=4$  exemplarily illustrate the scattering of the total channel resistances  $R_{\text{total}}$  for small  $n$ .
